# Supplementary material
Source: publisher site journal article supplement (https://www.spandidos-publications.com/6236/downloadSupplementary)
Supplement: Supplementary file 1 [file downloadSupplementary]

## Sheet: Sheet1
Table SII. A total of 243 glycolysis-related gene profiles were obtained from the Molecular Signatures Database (‘Hallmark glycolysis’ and ‘Kyoto Encyclopedia of Genes and Genomes glycolysis gluconeogenesis’; http://www.gsea-msigdb.org).
Gene
ABCB6
ACSS1
ACSS2
ADH1A
ADH1B
ADH1C
ADH4
ADH5
ADH6
ADH7
ADORA2B
AGL
AGRN
AK3
AK4
AKR1A1
ALDH1A3
ALDH1B1
ALDH2
ALDH3A1
ALDH3A2
ALDH3B1
ALDH3B2
ALDH7A1
ALDH9A1
ALDOA
ALDOB
ALDOC
ALG1
ANG
ANGPTL4
ANKZF1
ARPP19
ARTN
AURKA
B3GALT6
B3GAT1
B3GAT3
B3GNT3
B4GALT1
B4GALT2
B4GALT4
B4GALT7
BIK
BPGM
BPNT1
CACNA1H
CAPN5
CASP6
CD44
CDK1
CENPA
CHPF
CHPF2
CHST1
CHST12
CHST2
CHST4
CHST6
CITED2
CLDN3
CLDN9
CLN6
COG2
COL5A1
COPB2
CTH
CXCR4
CYB5A
DCN
DDIT4
DEPDC1
DLAT
DLD
DPYSL4
DSC2
ECD
EFNA3
EGFR
EGLN3
ELF3
ENO1
ENO2
ENO3
ERO1A
EXT1
EXT2
FAM162A
FBP1
FBP2
FKBP4
FUT8
G6PC
G6PC2
G6PD
GAL3ST1
GALE
GALK1
GALK2
GALM
GAPDH
GAPDHS
GCK
GCLC
GFPT1
GFUS
GLCE
GLRX
GMPPA
GMPPB
GNE
GNPDA1
GOT1
GOT2
GPC1
GPC3
GPC4
GPI
GPR87
GUSB
GYS1
GYS2
HAX1
HDLBP
HK1
HK2
HK3
HMMR
HOMER1
HS2ST1
HS6ST2
HSPA5
IDH1
IDUA
IER3
IGFBP3
IL13RA1
IRS2
ISG20
KDELR3
KIF20A
KIF2A
LCT
LDHA
LDHAL6A
LDHAL6B
LDHB
LDHC
LHPP
LHX9
MDH1
MDH2
ME1
ME2
MED24
MERTK
MET
MIF
MIOX
MPI
MXI1
NANP
NASP
NDST3
NDUFV3
NOL3
NSDHL
NT5E
P4HA1
P4HA2
PAM
PAXIP1
PC
PCK1
PCK2
PDHA1
PDHA2
PDHB
PDK3
PFKFB1
PFKL
PFKM
PFKP
PGAM1
PGAM2
PGAM4
PGK1
PGK2
PGLS
PGM1
PGM2
PHKA2
PKLR
PKM
PKP2
PLOD1
PLOD2
PMM2
POLR3K
PPFIA4
PPIA
PPP2CB
PRPS1
PSMC4
PYGB
PYGL
QSOX1
RARS1
RBCK1
RPE
RRAGD
SAP30
SDC1
SDC2
SDC3
SDHC
SLC16A3
SLC25A10
SLC25A13
SLC35A3
SLC37A4
SOD1
SOX9
SPAG4
SRD5A3
STC1
STC2
STMN1
TALDO1
TFF3
TGFA
TGFBI
TKTL1
TPBG
TPI1
TPST1
TXN
UGP2
VCAN
VEGFA
VLDLR
XYLT2
ZNF292
